# Supplementary material for: Decoloring Methyl Orange under Sunlight by a Photocatalytic Membrane Reactor Based on ZnO Nanoparticles and Polypropylene Macroporous Membrane
Source: Hindawi journal article supplement (doi:10.1155/2013/451398), 2013-01-01
Supplement: f1 [file 451398.f1.doc]

**Supporting Information**

**Decoloring methyl orange under sunlight by a photocatalytic membrane reactor based on ZnO nanoparticles and polypropylene macroporous membrane**

Bing Hu1,2, Jin Zhou1,2,*, Xiu-Min Wu2

1. Department of Material and Chemistry Engineering, Chizhou University, Chizhou, Anhui 247000, China

2. Laboratory of Functional Molecular Solids, Ministry of Education, Anhui Key Laboratory of Molecular-Based Materials, College of Chemistry and Materials Science, Anhui Normal University, 1 East Beijing Rd., Wuhu, Anhui 241000, China

Immobilization degree of ZnO NPs immobilized PPMMs with different GD of PHEMA.

| GD, % (wt) | ID, % (wt) |
| --- | --- |
| 0 | 3.0 |
| 11.1 | 4.8 |
| 35.5 | 5.3 |
| 36.0 | 6.2 |
